# Supplementary material for: Molecular-Charge-Contact-Based Ion-Sensitive Field-Effect Transistor Sensor in Microfluidic System for Protein Sensing
Source: PubMed Central journal article supplement (PMC6695797; doi:10.3390/s19153393), 2019-08-02
Supplement: sensors-19-03393-s001.pdf [file sensors-19-03393-s001.pdf]

**Supplementary Materials**

**Molecular-Charge-Contact-Based Ion-Sensitive Field-Effect  
Transistor Sensor in Microfluidic System for Protein Sensing**

Haoyue Yang and Toshiya Sakata\*

Department of Materials Engineering, School of Engineering, The University of Tokyo,  
7-3-1 Hongo, Bunkyo-ku, Tokyo 113-8656, Japan

\*Corresponding author. E-mail: [sakata@biofet.t.u-tokyo.ac.jp](mailto:sakata@biofet.t.u-tokyo.ac.jp)

### S1. Previous MCC method

**Figure S1** shows the change in interfacial potential ( $\Delta V_{\text{out}}$ ) obtained by the previously reported MCC method (**Figure 1b**). Upon adding the biotin-coated magnetic beads with streptavidin,  $\Delta V_{\text{out}}$  drastically increased owing to the direct attachment of magnetic beads to the gate insulator and subsequently decreased gradually when the measurement solution flowed. That is, the effect of the direct attachment of magnetic beads to the gate insulator on the electrical responses was very large and then it took a long time to determine the baseline of interfacial potential; therefore, the actual signal used for biomolecular recognition may be distorted in the MCC method shown in **Figure 1b**.

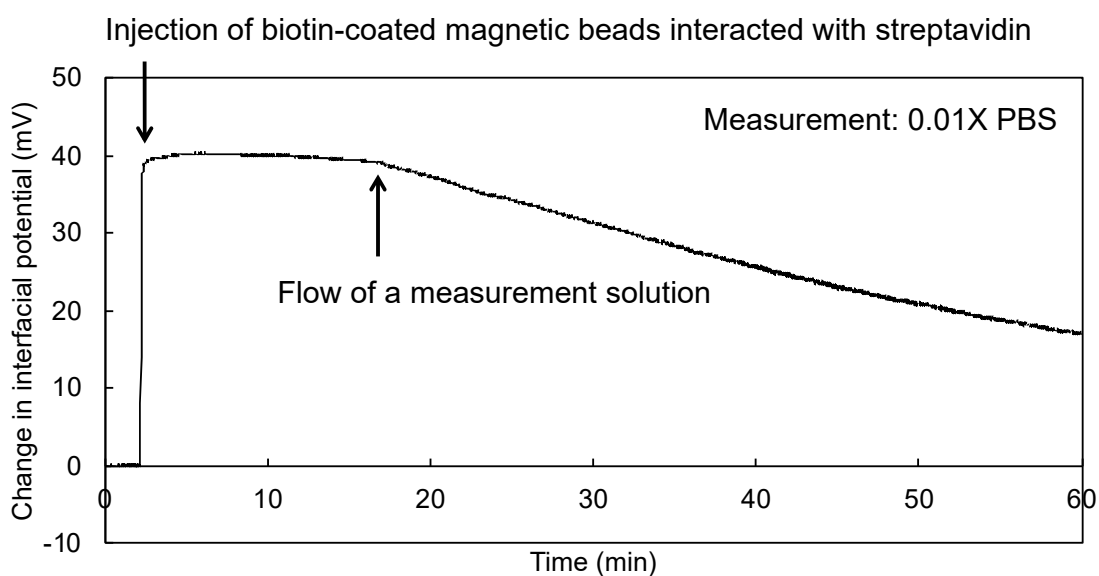

**Figure S1.** Change in interfacial potential at solution/gate insulator interface for previous MCC method.

## S2. Source-follower circuit for FET real-time measurement

In this study, the change in surface potential was monitored using the source-follower circuit shown in **Figure S2** [S1]. Here,  $V_G$  and  $V_D$  were set to constant values and  $V_S$  was controlled at a constant  $I_{DS}$ .

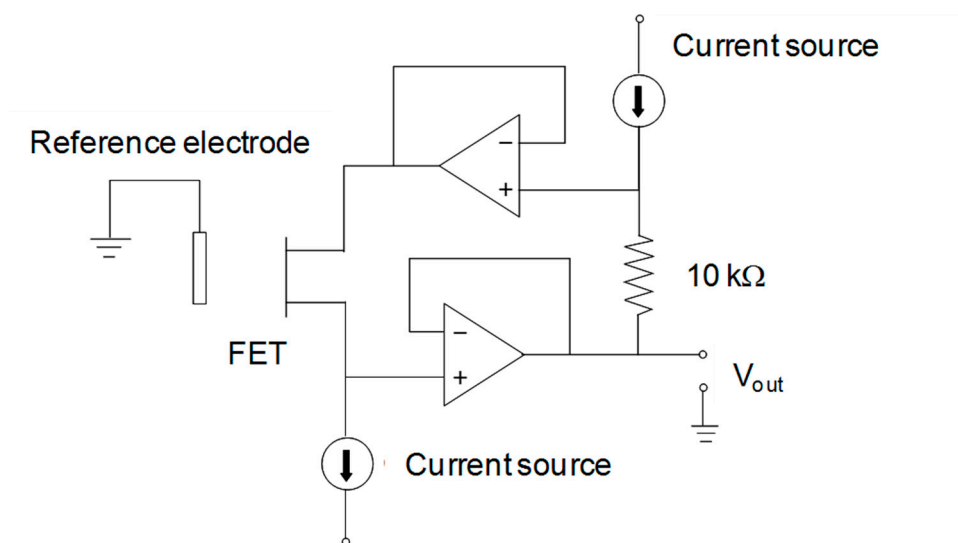

**Figure S2.** Electrical circuit. The change in surface potential ( $\Delta V_{out}$ ) at the gate was measured at a constant  $I_D$  (1 mA) and  $V_D$  (2.5 V) using the source follower circuit.

### S3. $\Delta V_2$ obtained by the control measurement

**Figure S3** shows  $\Delta V_2$  obtained by the control measurement without magnetic beads in a variety of PBS solutions. The ionic strength of buffer solution was changed from 1X to 0.01X PBS.  $\Delta V_2$  for the ISFET sensor without magnetic beads did not change in the 1X and 0.1X PBS solutions, but shifted in the negative direction by the amount of about 20 mV in the 0.01X PBS solution. This negative shift in  $\Delta V_2$  in the 0.01X PBS solution indicated the increase in negative charges at the gate, different from the positive shift in  $\Delta V_2$  in the 0.01X PBS solution for the sample measurement (**Figure 4a**). That is, streptavidin molecules with negative charges would have been nonspecifically adsorbed at the gate surface and then detected according to the Debye length limit from the gate surface in the diluted solution. On the other hand, the diluted buffer solutions, such as 0.01X PBS, might have been affected by the dissolution of carbon dioxide in them under ambient conditions.

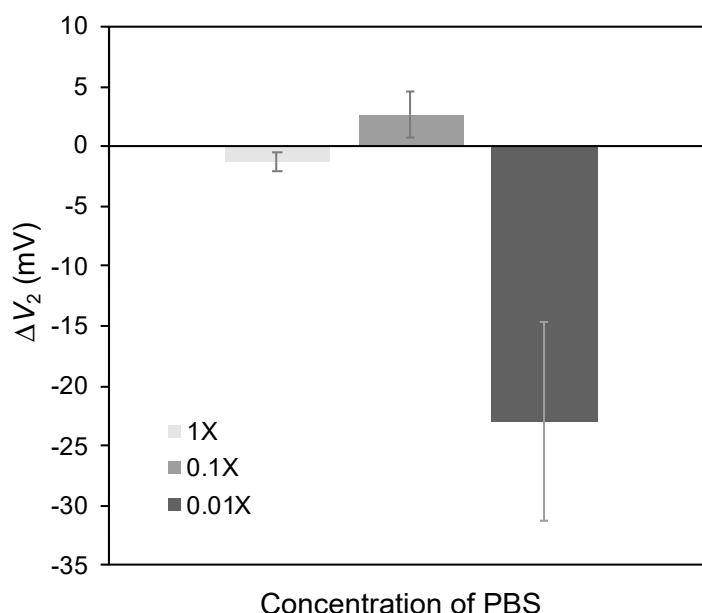

**Figure S3.** Effect of ionic strength on  $\Delta V_2$  in magnetic beads-free measurement.

#### S4. Calculation of LOD

Considering the Kaiser method, the lowest concentration of streptavidin that can be detected by the MCC method is calculated from  $\Delta V_2^{min}$  showing a significant difference from the average  $\Delta V_2$  at the concentration of streptavidin in the blank ( $C = 0$ ).  $C$  indicates the concentration of streptavidin. In **Figure 5**, an approximately straight line is drawn in the concentration range from 1.8  $\mu\text{M}$  to 180  $\mu\text{M}$ , within which streptavidin can be detected, and extrapolated to the  $\Delta V_2$  axis. This relationship is expressed as

$$\Delta V_2 = 3.7C + 0.93 , \quad (1)$$

where the y-intercept (0.93) means the average  $\Delta V_2$  in the blank. Here, the corrected sample standard deviation ( $\sigma$ ) is

$$\sigma = \sqrt{\left\{ \sum_{i=1}^n (\Delta V_2^i - \widetilde{\Delta V_2})^2 \right\} / (n - 1)} , \quad (2)$$

where  $\widetilde{\Delta V_2}$  shows the average  $\Delta V_2^i$  of a detected signal and  $n$  indicates the number of detected output signals. Moreover, the reliable range of  $w$  in the blank is indicated as

$$w = 3\sigma + 0.93 . \quad (3)$$

That is, the LOD ( $C_{LOD}$ ) is calculated using equations (1)–(3) on the basis of the output signal  $\Delta V_2^{min}(w)$  that shows  $+3\sigma$  from the average  $\Delta V_2$  in the blank (0.93).

Considering the above, the LOD for streptavidin for the MCC method was calculated to be about 2.3  $\mu\text{M}$ .

## S5. LOD for streptavidin–biotin interaction

| Method                              | Limit of detection (LOD) | Ref. |
|-------------------------------------|--------------------------|------|
| Potentiometric enzyme immunoassay   | 80 nM                    | 26   |
| Fluorometric assay                  | 3 $\mu$ M                | 27   |
| Fluorescence polarization           | 80 pM                    | 28   |
| Quartz crystal microbalance         | 300 nM                   | 29   |
| Localized surface plasmon resonance | 5 nM                     | 30   |

**Table S1** Limit of detection (LOD) for streptavidin–biotin interaction detection reported in previous papers.<sup>26-30</sup> These references are shown in the article.

## S6. Electrical characteristic of ISFET sensor

**Figure S4a** shows the concept of ISFET sensor. The gate ( $\text{Ta}_2\text{O}_5/\text{SiO}_2$ ) of the ISFET was set in the polycarbonate ring with a diameter of 18 mm (1 mL). That is, the change in pH in the polycarbonate ring, where a buffer solution was poured, was continuously monitored using the ISFET sensor. The standard buffer solutions (pH 4.01, 6.86, 7.41, and 9.18) were used for evaluating pH responsivities. The semiconducting material is separated from the solution by the gate insulator, the thickness of which is in the order of 100 nm. The gate insulator is often composed of an oxide, such as  $\text{SiO}_2$ ,  $\text{Ta}_2\text{O}_5$ ,  $\text{Al}_2\text{O}_3$  or nitrides (e.g.,  $\text{Si}_3\text{N}_4$ ) [S2]. The hydroxy groups are formed at the surface of the gate insulator in the solution and are thus responsive to hydrogen ions (**Figure S4a**). These positive charges at the gate surface electrostatically interact with electrons at the channel in the silicon substrate. The field effect induced by the changes in the charge densities at the gate causes a change in the threshold voltage ( $\Delta V_T$ ) at a constant drain source current ( $I_D$ ) in the gate voltage ( $V_G$ )– $I_D$  electrical characteristic. This electrical response of the ISFET to hydrogen ions is Nernstian at about 59.1 mV/pH at 25 °C [S3,S4]. In fact,  $\Delta V_T$  was measured with changes in pH using one of the ISFET sensors in this study (**Figure S4b**). From such electrical characteristics, the average pH sensitivity was found to be about 55 mV/pH at 25 °C for the 6 ISFET sensors used in this study, as shown in **Figure S5c**. According to the detection principle, the surface potential at the gate surface was continuously monitored using a source follower circuit, as shown in **Figure 3**. As a result, the potential change ( $\Delta V_{\text{out}}$ ) at the interface between the gate insulator and an aqueous solution, which corresponds to  $-\Delta V_T$ , can be directly output at a constant  $I_D$  [S1].

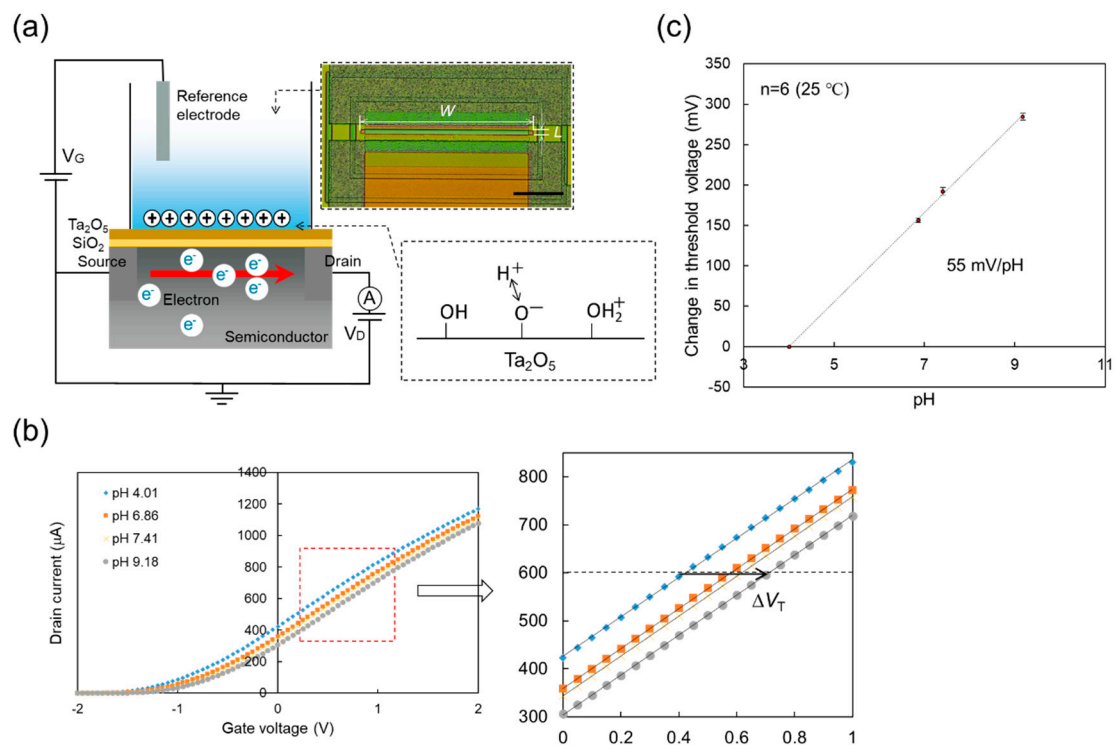

**Figure S4.** (a) Conceptual structure of ISFET sensor for electrical measurements. The channel was designed to have a width ( $W$ ) and length ( $L$ ) of 340 and 10  $\mu m$ , respectively. Scale bar = 100  $\mu m$ . Hydroxy groups at the oxide membrane in a solution exhibit the equilibrium reaction with hydrogen ions. (b)  $V_G$ - $I_D$  electrical characteristic of one of the ISFET sensors used in this study. The shift in  $V_G$  at a constant  $I_D$  of 1 mA was estimated as the change in  $V_T$  when the pH was changed from a pH of 4.01 to 9.18. (c) Calibration curve, which was analyzed based on the data shown in (b). The pH sensitivity of this ISFET sensor was about 55 mV/pH, which almost showed a Nernstian response at  $25^\circ C$ .  $V_G$  at a pH of 4.01 was offset to 0.



## REFERENCES

- S1. Sakata, T., Kamahori, M., and Miyahara, Y. (2005). DNA analysis chip based on field effect transistors. *Jpn. J. Appl. Phys.* *44 (No. 4B)*, 2854–2859.
- S2. McBride, P.T.; Janata, J.; Comte, P.A.; Moss, S.D.; Johnson, C.C. Ion-selective field effect transistors with polymeric membranes. *Anal. Chim. Acta* **1979**, *108*, 239–245.
- S3. Bergveld, P. Development, Operation and Application of the Tool for Electrophysiology. *IEEE Trans. Biomed. Eng.* **1972**, *BME-19*, 342–351.
- S4. Esashi, M.; Matsuo, T. Integrated micro-multi-ion sensor using field effect of semiconductor. *IEEE Trans. Biomed. Eng.* **1978**, *BME-25*, 184–192.
